# Supplementary material
Source: MDPI journal article supplement (https://www.mdpi.com/2073-4441/11/6/1282)
Supplement: s1 [file s1]

# Supplemental Materials

## Unmapped Water Access: Locating the Role of Religion in Access to Municipal Water Supply in Ahmedabad

Vrushti Mawani

1. The word 'pucca' is an adaptation from Hindi and broadly denotes 'properly constructed' (as opposed to 'kachha' is used to mean 'temporary' or 'poorly built'). Literally translated, 'pucca' means cooked, while 'kachha' means raw.
2. Submitted in the High Court of Gujarat at Ahmedabad as Annexure E of Writ Petition (PIL) 37 of 2016 by Amrish Patel and Musebhai Khatumbara. The original document is in Gujarati, and has been translated for the purposes of this paper by me.
3. While caste, class, relationships of patronage and so on are also undoubtedly other aspects influencing access to housing and basic services, I limit this discussion to religion given the focus of this paper.
4. My overarching methodological framework is informed by Institutional Ethnography (IE), which: (a) aims to make visible how knowledge and power come together in everyday settings to organize people's lives, and (b) draws on local everyday experiences to confront and analyze how people's experiences come to be dominated by external forces [26] (p. 12). Following IE's cue of taking as its starting point the "everyday world as problematic" [27] (p. 40), I began my research from 7 neighbourhoods with varying conditions of class, religion, and legality across Sarkhej and Makhtampura-two Muslim wards of Ahmedabad. Access to these neighbourhoods was made possible by three local NGOs to whom I am immensely grateful. Starting with 3 to 4 residents from each neighbourhood, I then followed "the water... across space and through time" [5] (p. 15), interviewing actors that the residents mentioned as being in specific ways important for their water access. I ended up conducting in-depth interviews with 64 people, neighbourhood walks with 21, and short but often insightful conversations with many more. Being an outsider to Ahmedabad's Muslim community, maintaining reflexivity was critical so as to not offend the sensibilities of my research participants while also eliciting meaningful and relevant data. However, having been born and raised in the city helped me navigate the often protracted and sometimes unproductive data collection endeavours. Being able to speak both local languages (Hindi and Gujarati), and having two kids who I often took along to the field, seemed to help my research participants, especially the women, feel comfortable talking to me. For narratives collected through interviews, triangulation was carried out by corroborating accounts at different data points: residents, engineers, planners, local political leaders, NGOs based in the area, lawyers, builders, and so on. Often these narratives were interspersed with references to legal orders or other documentary evidences which not only helped triangulate data but also made visible power dynamics influencing the phenomenon being studied.
5. This is based on my calculations using statistics provided on pages 10, 13 and 14, in the ICRIER document published by AMC in 2013.
6. One news piece published in August 2002 says: "For many in Ahmedabad, the past few months have been a nightmare. But on August 28, dreams flowed along with the river's current-literally-when colourful boats and thousands of diyas (lamps) floated in the till recently parched and putrid Sabarmati river... The merriment was made possible by the diversion of water to Sabarmati from the overflowing Narmada dam, 225 km away, a few days ago. Slogans like

"Narmade, Sarvade" (O Narmada, our lifeline) rent the air as firecrackers lit up the sky in myriad colours."

7. I was given these estimates by the Municipal Councillors of Makhtampura and Sarkhej wards. These estimates are not Census based but are rather extrapolations based on the electoral lists of the wards. There are no accurate population estimates available for these areas.
8. [http://www.auda.org.in/uploads/Assets/impactfee/Salient\\_features\\_of\\_Prevailing\\_GDCR.pdf](http://www.auda.org.in/uploads/Assets/impactfee/Salient_features_of_Prevailing_GDCR.pdf)
9. While the publication date for this document is unclear, it would seem like it must have been published between 2005 and 2009.
